# Supplementary material for: Metagenomic sequencing suggests a diversity of RNA interference-like responses to viruses across multicellular eukaryotes
Source: PLoS Genet. 2018 Jul 30;14(7):e1007533. doi: 10.1371/journal.pgen.1007533 (PMC6085071; doi:10.1371/journal.pgen.1007533)
Supplement: S1 Table — Detailed descriptions of the sample collection locations, dates and numbers of individuals sampled for each target taxon, along with sample pool information, including which extraction pools were included in sequencing pools, and which were excluded due to detection of suspected nematode contamination. (XLSX) [file pgen.1007533.s010.xlsx]

## Sheet: Sheet1
Organism shortname	Species	Sample pool ID	Individuals in sample pool	Nematode contamination detected by PCR	Library A	Library B	Sampling site(s)	Site location(s): OS Grid Reference	Site location(s): Decimal degrees	Sampling date(s)	Sampled by	Notes
Sponge	Halichondria panicea	1	15	Y	N	N	Barns Ness: Dunbar, East Lothian, Scotland, United Kingdom	Barns Ness (NT 72305 77388)	Barns Ness (55.988° N, -2.445° W)	2014-07-11	Fergal Waldron, Darren Obbard, Graham Stone	Sampled from rock pools and the rocky shore at Barns Ness at low tide (corresponding to 1.00 metres at Dunbar according to tide tables https://www.tidetimes.org.uk/) on 11/7/14, which was 3 days before the predicted lowest July spring tide.
Sponge	Halichondria panicea	2	15	Y	N	N	Barns Ness: Dunbar, East Lothian, Scotland, United Kingdom	Barns Ness (NT 72305 77388)	Barns Ness (55.988° N, -2.445° W)	2014-07-11	Fergal Waldron, Darren Obbard, Graham Stone	Sampled from rock pools and the rocky shore at Barns Ness at low tide (corresponding to 1.00 metres at Dunbar according to tide tables https://www.tidetimes.org.uk/) on 11/7/14, which was 3 days before the predicted lowest July spring tide.
Sponge	Halichondria panicea	3	12	N	Y	N	Barns Ness: Dunbar, East Lothian, Scotland, United Kingdom	Barns Ness (NT 72305 77388)	Barns Ness (55.988° N, -2.445° W)	2014-07-11	Fergal Waldron, Darren Obbard, Graham Stone	Sampled from rock pools and the rocky shore at Barns Ness at low tide (corresponding to 1.00 metres at Dunbar according to tide tables https://www.tidetimes.org.uk/) on 11/7/14, which was 3 days before the predicted lowest July spring tide.
Sponge	Halichondria panicea	4	11	N	Y	Y	Barns Ness: Dunbar, East Lothian, Scotland, United Kingdom	Barns Ness (NT 72305 77388)	Barns Ness (55.988° N, -2.445° W)	2014-07-11	Fergal Waldron, Darren Obbard, Graham Stone	Sampled from rock pools and the rocky shore at Barns Ness at low tide (corresponding to 1.00 metres at Dunbar according to tide tables https://www.tidetimes.org.uk/) on 11/7/14, which was 3 days before the predicted lowest July spring tide.
Sponge	Halichondria panicea	5	14	N	Y	N	Barns Ness: Dunbar, East Lothian, Scotland, United Kingdom	Barns Ness (NT 72305 77388)	Barns Ness (55.988° N, -2.445° W)	2014-07-11	Fergal Waldron, Darren Obbard, Graham Stone	Sampled from rock pools and the rocky shore at Barns Ness at low tide (corresponding to 1.00 metres at Dunbar according to tide tables https://www.tidetimes.org.uk/) on 11/7/14, which was 3 days before the predicted lowest July spring tide.
Anemone	Actinia equina	1	15	Y	N	N	Barns Ness: Dunbar, East Lothian, Scotland, United Kingdom	Barns Ness (NT 72305 77388)	Barns Ness (55.988° N, -2.445° W)	2014-07-11	Fergal Waldron, Darren Obbard, Graham Stone	Sampled from rock pools and the rocky shore at Barns Ness at low tide (corresponding to 1.00 metres at Dunbar according to tide tables https://www.tidetimes.org.uk/) on 11/7/14, which was 3 days before the predicted lowest July spring tide.
Anemone	Actinia equina	2	15	Y	N	N	Barns Ness: Dunbar, East Lothian, Scotland, United Kingdom	Barns Ness (NT 72305 77388)	Barns Ness (55.988° N, -2.445° W)	2014-07-11	Fergal Waldron, Darren Obbard, Graham Stone	Sampled from rock pools and the rocky shore at Barns Ness at low tide (corresponding to 1.00 metres at Dunbar according to tide tables https://www.tidetimes.org.uk/) on 11/7/14, which was 3 days before the predicted lowest July spring tide.
Anemone	Actinia equina	3	15	Y	N	N	Barns Ness: Dunbar, East Lothian, Scotland, United Kingdom	Barns Ness (NT 72305 77388)	Barns Ness (55.988° N, -2.445° W)	2014-07-11	Fergal Waldron, Darren Obbard, Graham Stone	Sampled from rock pools and the rocky shore at Barns Ness at low tide (corresponding to 1.00 metres at Dunbar according to tide tables https://www.tidetimes.org.uk/) on 11/7/14, which was 3 days before the predicted lowest July spring tide.
Anemone	Actinia equina	4	15	N	Y	N	Barns Ness: Dunbar, East Lothian, Scotland, United Kingdom	Barns Ness (NT 72305 77388)	Barns Ness (55.988° N, -2.445° W)	2014-07-11	Fergal Waldron, Darren Obbard, Graham Stone	Sampled from rock pools and the rocky shore at Barns Ness at low tide (corresponding to 1.00 metres at Dunbar according to tide tables https://www.tidetimes.org.uk/) on 11/7/14, which was 3 days before the predicted lowest July spring tide.
Anemone	Actinia equina	5	15	N	Y	Y	Barns Ness: Dunbar, East Lothian, Scotland, United Kingdom	Barns Ness (NT 72305 77388)	Barns Ness (55.988° N, -2.445° W)	2014-07-11	Fergal Waldron, Darren Obbard, Graham Stone	Sampled from rock pools and the rocky shore at Barns Ness at low tide (corresponding to 1.00 metres at Dunbar according to tide tables https://www.tidetimes.org.uk/) on 11/7/14, which was 3 days before the predicted lowest July spring tide.
Anemone	Actinia equina	6	15	Y	N	N	Barns Ness: Dunbar, East Lothian, Scotland, United Kingdom	Barns Ness (NT 72305 77388)	Barns Ness (55.988° N, -2.445° W)	2014-07-11	Fergal Waldron, Darren Obbard, Graham Stone	Sampled from rock pools and the rocky shore at Barns Ness at low tide (corresponding to 1.00 metres at Dunbar according to tide tables https://www.tidetimes.org.uk/) on 11/7/14, which was 3 days before the predicted lowest July spring tide.
Anemone	Actinia equina	7	14	Y	N	N	Barns Ness: Dunbar, East Lothian, Scotland, United Kingdom	Barns Ness (NT 72305 77388)	Barns Ness (55.988° N, -2.445° W)	2014-07-11	Fergal Waldron, Darren Obbard, Graham Stone	Sampled from rock pools and the rocky shore at Barns Ness at low tide (corresponding to 1.00 metres at Dunbar according to tide tables https://www.tidetimes.org.uk/) on 11/7/14, which was 3 days before the predicted lowest July spring tide.
Anemone	Actinia equina	8	15	N	N	Y	Kames Bay: Great Cumbrae Island, North Ayreshire, Scotland, United Kingdom	Kames Bay (NS 17216 54939)	Kames Bay (55.754° N, -4.914° W)	2014-08-12	Fergal Waldron, Darren Obbard, Graham Stone, Andrew Rambaut, Michael Dye	Sampled from rock pools and the rocky shore on Great Cumbrae at low tide (corresponding to between 0.1-0.2 metres at Millport over those three days according to tide tables https://www.tidetimes.org.uk/) over a period close to/including the lowest predicted August spring tide (12/8/14)
Anemone	Actinia equina	9	15	Y	N	N	Kames Bay: Great Cumbrae Island, North Ayreshire, Scotland, United Kingdom	Kames Bay (NS 17216 54939)	Kames Bay (55.754° N, -4.914° W)	2014-08-12	Fergal Waldron, Darren Obbard, Graham Stone, Andrew Rambaut, Michael Dye	Sampled from rock pools and the rocky shore on Great Cumbrae at low tide (corresponding to between 0.1-0.2 metres at Millport over those three days according to tide tables https://www.tidetimes.org.uk/) over a period close to/including the lowest predicted August spring tide (12/8/14)
Anemone	Actinia equina	10	15	N	Y	N	Kames Bay: Great Cumbrae Island, North Ayreshire, Scotland, United Kingdom	Kames Bay (NS 17216 54939)	Kames Bay (55.754° N, -4.914° W)	2014-08-12	Fergal Waldron, Darren Obbard, Graham Stone, Andrew Rambaut, Michael Dye	Sampled from rock pools and the rocky shore on Great Cumbrae at low tide (corresponding to between 0.1-0.2 metres at Millport over those three days according to tide tables https://www.tidetimes.org.uk/) over a period close to/including the lowest predicted August spring tide (12/8/14)
Anemone	Actinia equina	11	15	N	Y	N	Kames Bay: Great Cumbrae Island, North Ayreshire, Scotland, United Kingdom	Kames Bay (NS 17216 54939)	Kames Bay (55.754° N, -4.914° W)	2014-08-12	Fergal Waldron, Darren Obbard, Graham Stone, Andrew Rambaut, Michael Dye	Sampled from rock pools and the rocky shore on Great Cumbrae at low tide (corresponding to between 0.1-0.2 metres at Millport over those three days according to tide tables https://www.tidetimes.org.uk/) over a period close to/including the lowest predicted August spring tide (12/8/14)
Anemone	Actinia equina	12	15	N	Y	N	Kames Bay: Great Cumbrae Island, North Ayreshire, Scotland, United Kingdom	Kames Bay (NS 17216 54939)	Kames Bay (55.754° N, -4.914° W)	2014-08-12	Fergal Waldron, Darren Obbard, Graham Stone, Andrew Rambaut, Michael Dye	Sampled from rock pools and the rocky shore on Great Cumbrae at low tide (corresponding to between 0.1-0.2 metres at Millport over those three days according to tide tables https://www.tidetimes.org.uk/) over a period close to/including the lowest predicted August spring tide (12/8/14)
Anemone	Actinia equina	13	15	N	Y	N	Kames Bay: Great Cumbrae Island, North Ayreshire, Scotland, United Kingdom	Kames Bay (NS 17216 54939)	Kames Bay (55.754° N, -4.914° W)	2014-08-12	Fergal Waldron, Darren Obbard, Graham Stone, Andrew Rambaut, Michael Dye	Sampled from rock pools and the rocky shore on Great Cumbrae at low tide (corresponding to between 0.1-0.2 metres at Millport over those three days according to tide tables https://www.tidetimes.org.uk/) over a period close to/including the lowest predicted August spring tide (12/8/14)
Anemone	Actinia equina	14	20	N	Y	N	Kames Bay: Great Cumbrae Island, North Ayreshire, Scotland, United Kingdom	Kames Bay (NS 17216 54939)	Kames Bay (55.754° N, -4.914° W)	2014-08-12	Fergal Waldron, Darren Obbard, Graham Stone, Andrew Rambaut, Michael Dye	Sampled from rock pools and the rocky shore on Great Cumbrae at low tide (corresponding to between 0.1-0.2 metres at Millport over those three days according to tide tables https://www.tidetimes.org.uk/) over a period close to/including the lowest predicted August spring tide (12/8/14)
Whelk	Nucella lapillus	1	20	N	Y	Y	Barns Ness: Dunbar, East Lothian, Scotland, United Kingdom	Barns Ness (NT 72305 77388)	Barns Ness (55.988° N, -2.445° W)	2014-07-11	Fergal Waldron, Darren Obbard, Graham Stone	Sampled from rock pools and the rocky shore at Barns Ness at low tide (corresponding to 1.00 metres at Dunbar according to tide tables https://www.tidetimes.org.uk/) on 11/7/14, which was 3 days before the predicted lowest July spring tide.
Whelk	Nucella lapillus	2	20	N	Y	N	Barns Ness: Dunbar, East Lothian, Scotland, United Kingdom	Barns Ness (NT 72305 77388)	Barns Ness (55.988° N, -2.445° W)	2014-07-11	Fergal Waldron, Darren Obbard, Graham Stone	Sampled from rock pools and the rocky shore at Barns Ness at low tide (corresponding to 1.00 metres at Dunbar according to tide tables https://www.tidetimes.org.uk/) on 11/7/14, which was 3 days before the predicted lowest July spring tide.
Whelk	Nucella lapillus	3	16	N	Y	N	Barns Ness: Dunbar, East Lothian, Scotland, United Kingdom	Barns Ness (NT 72305 77388)	Barns Ness (55.988° N, -2.445° W)	2014-07-11	Fergal Waldron, Darren Obbard, Graham Stone	Sampled from rock pools and the rocky shore at Barns Ness at low tide (corresponding to 1.00 metres at Dunbar according to tide tables https://www.tidetimes.org.uk/) on 11/7/14, which was 3 days before the predicted lowest July spring tide.
Whelk	Nucella lapillus	4	20	N	Y	N	Barns Ness: Dunbar, East Lothian, Scotland, United Kingdom	Barns Ness (NT 72305 77388)	Barns Ness (55.988° N, -2.445° W)	2014-07-11	Fergal Waldron, Darren Obbard, Graham Stone	Sampled from rock pools and the rocky shore at Barns Ness at low tide (corresponding to 1.00 metres at Dunbar according to tide tables https://www.tidetimes.org.uk/) on 11/7/14, which was 3 days before the predicted lowest July spring tide.
Whelk	Nucella lapillus	5	20	N	Y	N	Barns Ness: Dunbar, East Lothian, Scotland, United Kingdom	Barns Ness (NT 72305 77388)	Barns Ness (55.988° N, -2.445° W)	2014-07-11	Fergal Waldron, Darren Obbard, Graham Stone	Sampled from rock pools and the rocky shore at Barns Ness at low tide (corresponding to 1.00 metres at Dunbar according to tide tables https://www.tidetimes.org.uk/) on 11/7/14, which was 3 days before the predicted lowest July spring tide.
Whelk	Nucella lapillus	6	20	Y	N	N	Barns Ness: Dunbar, East Lothian, Scotland, United Kingdom	Barns Ness (NT 72305 77388)	Barns Ness (55.988° N, -2.445° W)	2014-07-11	Fergal Waldron, Darren Obbard, Graham Stone	Sampled from rock pools and the rocky shore at Barns Ness at low tide (corresponding to 1.00 metres at Dunbar according to tide tables https://www.tidetimes.org.uk/) on 11/7/14, which was 3 days before the predicted lowest July spring tide.
Whelk	Nucella lapillus	7	20	N	Y	N	Barns Ness: Dunbar, East Lothian, Scotland, United Kingdom	Barns Ness (NT 72305 77388)	Barns Ness (55.988° N, -2.445° W)	2014-07-11	Fergal Waldron, Darren Obbard, Graham Stone	Sampled from rock pools and the rocky shore at Barns Ness at low tide (corresponding to 1.00 metres at Dunbar according to tide tables https://www.tidetimes.org.uk/) on 11/7/14, which was 3 days before the predicted lowest July spring tide.
Whelk	Nucella lapillus	8	15	N	Y	N	Ballockmartin Bay, Farland Bight, Kames Bay: Great Cumbrae Island, North Ayreshire, Scotland, United Kingdom	Ballockmartin Bay (NS 18278 56636), Farland Bight (NS 17336 54138), Kames Bay (NS 17216 54939)	Ballockmartin Bay (55.768° N, -4.898° W), Farland Bight (55.746° N, -4.911° W), Kames Bay (55.754° N, -4.914° W)	11/8/2014, 12/08/2014, 13/08/2014	Fergal Waldron, Darren Obbard, Graham Stone, Andrew Rambaut, Michael Dye	Sampled from rock pools and the rocky shore on Great Cumbrae at low tide (corresponding to between 0.1-0.2 metres at Millport over those three days according to tide tables https://www.tidetimes.org.uk/) over a period close to/including the lowest predicted August spring tide (12/8/14)
Whelk	Nucella lapillus	9	15	N	Y	N	Ballockmartin Bay, Farland Bight, Kames Bay: Great Cumbrae Island, North Ayreshire, Scotland, United Kingdom	Ballockmartin Bay (NS 18278 56636), Farland Bight (NS 17336 54138), Kames Bay (NS 17216 54939)	Ballockmartin Bay (55.768° N, -4.898° W), Farland Bight (55.746° N, -4.911° W), Kames Bay (55.754° N, -4.914° W)	11/8/2014, 12/08/2014, 13/08/2014	Fergal Waldron, Darren Obbard, Graham Stone, Andrew Rambaut, Michael Dye	Sampled from rock pools and the rocky shore on Great Cumbrae at low tide (corresponding to between 0.1-0.2 metres at Millport over those three days according to tide tables https://www.tidetimes.org.uk/) over a period close to/including the lowest predicted August spring tide (12/8/14)
Whelk	Nucella lapillus	10	15	N	Y	N	Ballockmartin Bay, Farland Bight, Kames Bay: Great Cumbrae Island, North Ayreshire, Scotland, United Kingdom	Ballockmartin Bay (NS 18278 56636), Farland Bight (NS 17336 54138), Kames Bay (NS 17216 54939)	Ballockmartin Bay (55.768° N, -4.898° W), Farland Bight (55.746° N, -4.911° W), Kames Bay (55.754° N, -4.914° W)	11/8/2014, 12/08/2014, 13/08/2014	Fergal Waldron, Darren Obbard, Graham Stone, Andrew Rambaut, Michael Dye	Sampled from rock pools and the rocky shore on Great Cumbrae at low tide (corresponding to between 0.1-0.2 metres at Millport over those three days according to tide tables https://www.tidetimes.org.uk/) over a period close to/including the lowest predicted August spring tide (12/8/14)
Whelk	Nucella lapillus	11	15	N	Y	Y	Ballockmartin Bay, Farland Bight, Kames Bay: Great Cumbrae Island, North Ayreshire, Scotland, United Kingdom	Ballockmartin Bay (NS 18278 56636), Farland Bight (NS 17336 54138), Kames Bay (NS 17216 54939)	Ballockmartin Bay (55.768° N, -4.898° W), Farland Bight (55.746° N, -4.911° W), Kames Bay (55.754° N, -4.914° W)	11/8/2014, 12/08/2014, 13/08/2014	Fergal Waldron, Darren Obbard, Graham Stone, Andrew Rambaut, Michael Dye	Sampled from rock pools and the rocky shore on Great Cumbrae at low tide (corresponding to between 0.1-0.2 metres at Millport over those three days according to tide tables https://www.tidetimes.org.uk/) over a period close to/including the lowest predicted August spring tide (12/8/14)
Brown Alga	Fucus serratus	1	20	NA	NA	Y	Barns Ness: Dunbar, East Lothian, Scotland, United Kingdom	Barns Ness (NT 72305 77388)	Barns Ness (55.988° N, -2.445° W)	2014-07-11	Fergal Waldron, Darren Obbard, Graham Stone	Sampled from rock pools and the rocky shore at Barns Ness at low tide (corresponding to 1.00 metres at Dunbar according to tide tables https://www.tidetimes.org.uk/) on 11/7/14, which was 3 days before the predicted lowest July spring tide.
Brown Alga	Fucus serratus	2	20	NA	NA	Y	Barns Ness: Dunbar, East Lothian, Scotland, United Kingdom	Barns Ness (NT 72305 77388)	Barns Ness (55.988° N, -2.445° W)	2014-07-11	Fergal Waldron, Darren Obbard, Graham Stone	Sampled from rock pools and the rocky shore at Barns Ness at low tide (corresponding to 1.00 metres at Dunbar according to tide tables https://www.tidetimes.org.uk/) on 11/7/14, which was 3 days before the predicted lowest July spring tide.
Brown Alga	Fucus serratus	3	20	NA	NA	Y	Barns Ness: Dunbar, East Lothian, Scotland, United Kingdom	Barns Ness (NT 72305 77388)	Barns Ness (55.988° N, -2.445° W)	2014-07-11	Fergal Waldron, Darren Obbard, Graham Stone	Sampled from rock pools and the rocky shore at Barns Ness at low tide (corresponding to 1.00 metres at Dunbar according to tide tables https://www.tidetimes.org.uk/) on 11/7/14, which was 3 days before the predicted lowest July spring tide.
Brown Alga	Fucus serratus	4	20	NA	NA	Y	Barns Ness: Dunbar, East Lothian, Scotland, United Kingdom	Barns Ness (NT 72305 77388)	Barns Ness (55.988° N, -2.445° W)	2014-07-11	Fergal Waldron, Darren Obbard, Graham Stone	Sampled from rock pools and the rocky shore at Barns Ness at low tide (corresponding to 1.00 metres at Dunbar according to tide tables https://www.tidetimes.org.uk/) on 11/7/14, which was 3 days before the predicted lowest July spring tide.
Brown Alga	Fucus serratus	5	20	NA	NA	Y	Barns Ness: Dunbar, East Lothian, Scotland, United Kingdom	Barns Ness (NT 72305 77388)	Barns Ness (55.988° N, -2.445° W)	2014-07-11	Fergal Waldron, Darren Obbard, Graham Stone	Sampled from rock pools and the rocky shore at Barns Ness at low tide (corresponding to 1.00 metres at Dunbar according to tide tables https://www.tidetimes.org.uk/) on 11/7/14, which was 3 days before the predicted lowest July spring tide.
Starfish	Asterias rubens	1	7	N	Y	N	Barns Ness: Dunbar, East Lothian, Scotland, United Kingdom	Barns Ness (NT 72305 77388)	Barns Ness (55.988° N, -2.445° W)	2014-07-11		Sampled from rock pools and the rocky shore at Barns Ness at low tide (corresponding to 1.00 metres at Dunbar according to tide tables https://www.tidetimes.org.uk/) on 11/7/14, which was 3 days before the predicted lowest July spring tide.
Starfish	Asterias rubens	2	10	N	Y	N	Ballockmartin Bay: Great Cumbrae Island, North Ayreshire, Scotland, United Kingdom	Ballockmartin Bay (NS 18278 56636)	Ballockmartin Bay (55.768° N, -4.898° W)	12/08/2014, 13/08/2014	Fergal Waldron, Darren Obbard, Graham Stone, Andrew Rambaut, Michael Dye	Sampled from rock pools and the rocky shore on Great Cumbrae at low tide (corresponding to between 0.1-0.2 metres at Millport over those three days according to tide tables https://www.tidetimes.org.uk/) over a period close to/including the lowest predicted August spring tide (12/8/14)
Starfish	Asterias rubens	3	10	N	Y	N	Ballockmartin Bay, Great Cumbrae	Ballockmartin Bay (NS 18278 56636)	Ballockmartin Bay (55.768° N, -4.898° W)	12/08/2014, 13/08/2014	Fergal Waldron, Darren Obbard, Graham Stone, Andrew Rambaut, Michael Dye	Sampled from rock pools and the rocky shore on Great Cumbrae at low tide (corresponding to between 0.1-0.2 metres at Millport over those three days according to tide tables https://www.tidetimes.org.uk/) over a period close to/including the lowest predicted August spring tide (12/8/14)
Starfish	Asterias rubens	4	10	N	Y	Y	Ballockmartin Bay, Great Cumbrae	Ballockmartin Bay (NS 18278 56636)	Ballockmartin Bay (55.768° N, -4.898° W)	12/08/2014, 13/08/2014	Fergal Waldron, Darren Obbard, Graham Stone, Andrew Rambaut, Michael Dye	Sampled from rock pools and the rocky shore on Great Cumbrae at low tide (corresponding to between 0.1-0.2 metres at Millport over those three days according to tide tables https://www.tidetimes.org.uk/) over a period close to/including the lowest predicted August spring tide (12/8/14)
Starfish	Asterias rubens	5	10	N	Y	N	Ballockmartin Bay, Great Cumbrae	Ballockmartin Bay (NS 18278 56636)	Ballockmartin Bay (55.768° N, -4.898° W)	12/08/2014, 13/08/2014	Fergal Waldron, Darren Obbard, Graham Stone, Andrew Rambaut, Michael Dye	Sampled from rock pools and the rocky shore on Great Cumbrae at low tide (corresponding to between 0.1-0.2 metres at Millport over those three days according to tide tables https://www.tidetimes.org.uk/) over a period close to/including the lowest predicted August spring tide (12/8/14)
Starfish	Asterias rubens	6	10	N	Y	N	Ballockmartin Bay, Great Cumbrae	Ballockmartin Bay (NS 18278 56636)	Ballockmartin Bay (55.768° N, -4.898° W)	12/08/2014, 13/08/2014	Fergal Waldron, Darren Obbard, Graham Stone, Andrew Rambaut, Michael Dye	Sampled from rock pools and the rocky shore on Great Cumbrae at low tide (corresponding to between 0.1-0.2 metres at Millport over those three days according to tide tables https://www.tidetimes.org.uk/) over a period close to/including the lowest predicted August spring tide (12/8/14)
Starfish	Asterias rubens	7	10	N	Y	N	Ballockmartin Bay, Great Cumbrae	Ballockmartin Bay (NS 18278 56636)	Ballockmartin Bay (55.768° N, -4.898° W)	12/08/2014, 13/08/2014	Fergal Waldron, Darren Obbard, Graham Stone, Andrew Rambaut, Michael Dye	Sampled from rock pools and the rocky shore on Great Cumbrae at low tide (corresponding to between 0.1-0.2 metres at Millport over those three days according to tide tables https://www.tidetimes.org.uk/) over a period close to/including the lowest predicted August spring tide (12/8/14)
Starfish	Asterias rubens	8	20	Y	N	N	Ballockmartin Bay, Great Cumbrae	Ballockmartin Bay (NS 18278 56636)	Ballockmartin Bay (55.768° N, -4.898° W)	12/08/2014, 13/08/2014	Fergal Waldron, Darren Obbard, Graham Stone, Andrew Rambaut, Michael Dye	Sampled from rock pools and the rocky shore on Great Cumbrae at low tide (corresponding to between 0.1-0.2 metres at Millport over those three days according to tide tables https://www.tidetimes.org.uk/) over a period close to/including the lowest predicted August spring tide (12/8/14)
Starfish	Asterias rubens	9	20	N	Y	N	Ballockmartin Bay, Great Cumbrae	Ballockmartin Bay (NS 18278 56636)	Ballockmartin Bay (55.768° N, -4.898° W)	12/08/2014, 13/08/2014	Fergal Waldron, Darren Obbard, Graham Stone, Andrew Rambaut, Michael Dye	Sampled from rock pools and the rocky shore on Great Cumbrae at low tide (corresponding to between 0.1-0.2 metres at Millport over those three days according to tide tables https://www.tidetimes.org.uk/) over a period close to/including the lowest predicted August spring tide (12/8/14)
Starfish	Asterias rubens	10	20	Y	N	N	Ballockmartin Bay, Great Cumbrae	Ballockmartin Bay (NS 18278 56636)	Ballockmartin Bay (55.768° N, -4.898° W)	12/08/2014, 13/08/2014	Fergal Waldron, Darren Obbard, Graham Stone, Andrew Rambaut, Michael Dye	Sampled from rock pools and the rocky shore on Great Cumbrae at low tide (corresponding to between 0.1-0.2 metres at Millport over those three days according to tide tables https://www.tidetimes.org.uk/) over a period close to/including the lowest predicted August spring tide (12/8/14)
Starfish	Asterias rubens	11	27	N	Y	Y	Ballockmartin Bay, Great Cumbrae	Ballockmartin Bay (NS 18278 56636)	Ballockmartin Bay (55.768° N, -4.898° W)	12/08/2014, 13/08/2014	Fergal Waldron, Darren Obbard, Graham Stone, Andrew Rambaut, Michael Dye	Sampled from rock pools and the rocky shore on Great Cumbrae at low tide (corresponding to between 0.1-0.2 metres at Millport over those three days according to tide tables https://www.tidetimes.org.uk/) over a period close to/including the lowest predicted August spring tide (12/8/14)
Starfish	Asterias rubens	12	20	N	Y	N	Ballockmartin Bay, Great Cumbrae	Ballockmartin Bay (NS 18278 56636)	Ballockmartin Bay (55.768° N, -4.898° W)	12/08/2014, 13/08/2014	Fergal Waldron, Darren Obbard, Graham Stone, Andrew Rambaut, Michael Dye	Sampled from rock pools and the rocky shore on Great Cumbrae at low tide (corresponding to between 0.1-0.2 metres at Millport over those three days according to tide tables https://www.tidetimes.org.uk/) over a period close to/including the lowest predicted August spring tide (12/8/14)
Starfish	Asterias rubens	13	30	N	Y	N	Ballockmartin Bay, Great Cumbrae	Ballockmartin Bay (NS 18278 56636)	Ballockmartin Bay (55.768° N, -4.898° W)	12/08/2014, 13/08/2014	Fergal Waldron, Darren Obbard, Graham Stone, Andrew Rambaut, Michael Dye	Sampled from rock pools and the rocky shore on Great Cumbrae at low tide (corresponding to between 0.1-0.2 metres at Millport over those three days according to tide tables https://www.tidetimes.org.uk/) over a period close to/including the lowest predicted August spring tide (12/8/14)
Earthworm	Lumbricus spp., and Amythas spp.	1	10	N	NA	Y	King's Buildings: Edinburgh, Midlothian, Scotland, United Kingdom	King's Buildings (NT 26784 70689)	King's Buildings (55.923° N, -3.173° W)	2015-11-08	Fergal Waldron	Sampled from exposed soil at the King's Buildings
Earthworm	Lumbricus spp., and Amythas spp.	2	10	N	NA	Y	King's Buildings: Edinburgh, Midlothian, Scotland, United Kingdom	King's Buildings (NT 26784 70689)	King's Buildings (55.923° N, -3.173° W)	2015-11-08	Fergal Waldron	Sampled from exposed soil at the King's Buildings
Earthworm	Lumbricus spp., and Amythas spp.	3	10	N	NA	Y	King's Buildings: Edinburgh, Midlothian, Scotland, United Kingdom	King's Buildings (NT 26784 70689)	King's Buildings (55.923° N, -3.173° W)	2015-11-08	Fergal Waldron	Sampled from exposed soil at the King's Buildings
Earthworm	Lumbricus spp., and Amythas spp.	4	8	Y	NA	N	King's Buildings: Edinburgh, Midlothian, Scotland, United Kingdom	King's Buildings (NT 26784 70689)	King's Buildings (55.923° N, -3.173° W)	2015-11-08	Fergal Waldron	Sampled from exposed soil at the King's Buildings
Earthworm	Lumbricus spp., and Amythas spp.	5	12	N	NA	Y	King's Buildings: Edinburgh, Midlothian, Scotland, United Kingdom	King's Buildings (NT 26784 70689)	King's Buildings (55.923° N, -3.173° W)	2015-11-08	Fergal Waldron	Sampled from exposed soil at the King's Buildings
Earthworm	Lumbricus spp., and Amythas spp.	6	10	N	NA	Y	King's Buildings: Edinburgh, Midlothian, Scotland, United Kingdom	King's Buildings (NT 26784 70689)	King's Buildings (55.923° N, -3.173° W)	2015-11-08	Fergal Waldron	Sampled from exposed soil at the King's Buildings
Earthworm	Lumbricus spp., and Amythas spp.	7	10	N	NA	Y	King's Buildings: Edinburgh, Midlothian, Scotland, United Kingdom	King's Buildings (NT 26784 70689)	King's Buildings (55.923° N, -3.173° W)	2015-11-08	Fergal Waldron	Sampled from exposed soil at the King's Buildings
Earthworm	Lumbricus spp., and Amythas spp.	8	16	N	NA	Y	King's Buildings: Edinburgh, Midlothian, Scotland, United Kingdom	King's Buildings (NT 26784 70689)	King's Buildings (55.923° N, -3.173° W)	2015-11-08	Fergal Waldron	Sampled from exposed soil at the King's Buildings
